# Supplementary material for: A dodecanuclear heterometallic dysprosium–cobalt wheel exhibiting single-molecule magnet behaviour
Source: Royal Society of Chemistry journal article supplement (doi:10.1039/c1cc12405f), 2011-01-01
Supplement: c1cc12405f.pdf [file c1cc12405f.pdf]

# Supporting Information for:

## Dodecanuclear Heterometallic Dysprosium-Cobalt Wheel

### Exhibiting Single-Molecule Magnet Behaviour

Li-Fei Zou, Lang Zhao, Yun-Nan Guo, Gui-Miao Yu, Yang Guo, Jinkui Tang,\* and  
Yun-Hui Li

#### *Experimental Section*

Synthesis of **1**: To a slurry of  $\text{H}_2\text{L}$  (0.030 g, 0.1 mmol) and triethylamine (0.014 ml, 0.1 mmol) in acetonitrile (20 mL), solid  $\text{Dy}(\text{SCN})_3 \cdot 6\text{H}_2\text{O}$  (0.045 g, 0.1 mmol) was added. After stirring for 3 h,  $\text{Co}(\text{OAc})_2 \cdot 4\text{H}_2\text{O}$  (0.025 g, 0.1 mmol) was added to the resulting yellow solution. Then the mixture was stirred for another 3 h, followed by filtration. X-ray quality green rectangular crystals of **1** were formed after two weeks. Yield: 15 mg (30%, based on Dy). Elemental analysis Calcd (%) for  $\text{C}_{114}\text{H}_{138}\text{Co}_4\text{Dy}_{10}\text{N}_{22}\text{O}_{62}\text{S}_{10}$ : C, 27.42; H, 2.76; N, 6.17. Found: C, 26.53; H, 2.41; N, 6.35. IR (KBr,  $\text{cm}^{-1}$ ): 3382(w), 2930(w), 2704(s), 1613(s), 1467(s), 1348(w), 1294(m), 1221(m), 1102(w), 1026(w), 961(w), 856(w), 778(w), 649(w), 545(w) and 450(w).

#### *X-ray Crystallography*

Crystal data for **1**:  $\text{C}_{114}\text{H}_{138}\text{Co}_4\text{Dy}_{10}\text{N}_{22}\text{O}_{62}\text{S}_{10}$ ,  $M_r = 4989.78$ , triclinic, space group  $P\bar{1}$ ,  $a = 17.1089(17)$  Å,  $b = 17.1317(9)$  Å,  $c = 18.7454(9)$  Å,  $\alpha = 115.646(1)^\circ$ ,  $\beta = 105.043(1)^\circ$ ,  $\gamma = 92.992(1)^\circ$ ,  $V = 4697.1(6)$  Å<sup>3</sup>,  $Z = 1$ ,  $D_c = 1.764$  g cm<sup>-3</sup>,  $R_{\text{int}} = 0.0256$ , 24174 reflections collected,  $R_1$  ( $wR_2$ ) = 0.0456 (0.1345) and  $S = 1.022$  for 12791 observed reflections out of 16536 unique reflections with  $I > 2\sigma(I)$ . Crystallographic data were collected at a temperature of 191(2) K on a Bruker ApexII CCD diffractometer with graphite monochromated Mo  $K\alpha$  radiation ( $\lambda = 0.71073$  Å). Data processing was accomplished with the SAINT processing program. The structure was solved by the direct methods and refined on  $F^2$  by full-matrix least squares using SHELXTL97. The locations of metal atoms were easily determined, and O, N and C atoms were subsequently determined from the difference Fourier maps. All non-hydrogen atoms were refined with anisotropic thermal parameters.

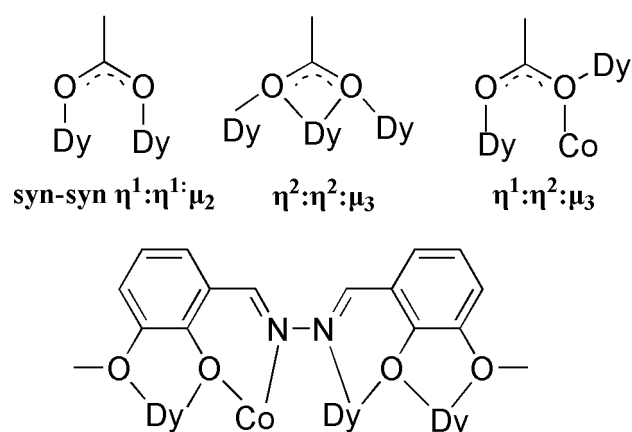

**Scheme S1** Top: Bridging modes of the acetate groups in compound **1**. Bottom: Binding mode of  $L^{2-}$  in compound **1**.

**Table S1** Bond valence sum calculations for compound **1**

| Atom | Co <sup>II</sup> | Co <sup>III</sup> |
|------|------------------|-------------------|
| Co1  | <u>2.5376</u>    | 2.5600            |
| Co2  | 3.1421           | <u>3.1461</u>     |

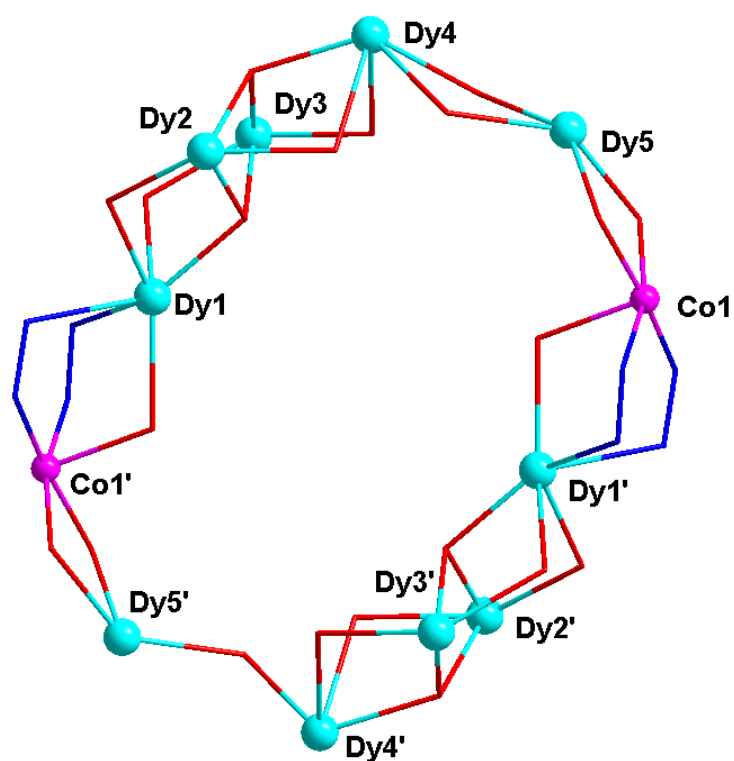

**Fig. S1** Linkage of two  $[\text{Dy}_5\text{Co}(\mu_3\text{-OH})_2]^{15+}$  subcores forming the  $\text{Dy}_{10}\text{Co}_2$  wheel.

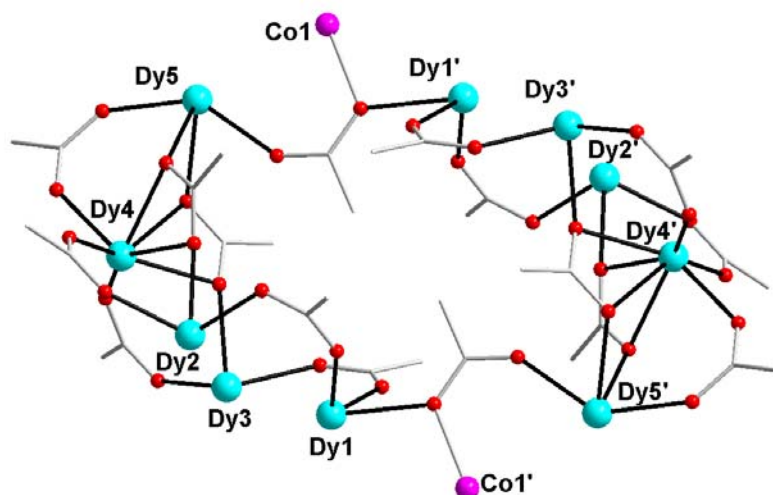

**Fig. S2** Ten Dy<sup>III</sup> and two Co<sup>II</sup> ions bridged by sixteen acetate groups.

Magnetic measurements were performed in the temperature range 1.9 –300 K, using a Quantum Design MPMS-XL SQUID magnetometer equipped with a 7 T magnet. The diamagnetic corrections for the compounds were estimated using Pascal's constants, and magnetic data were corrected for diamagnetic contributions of the sample holder.

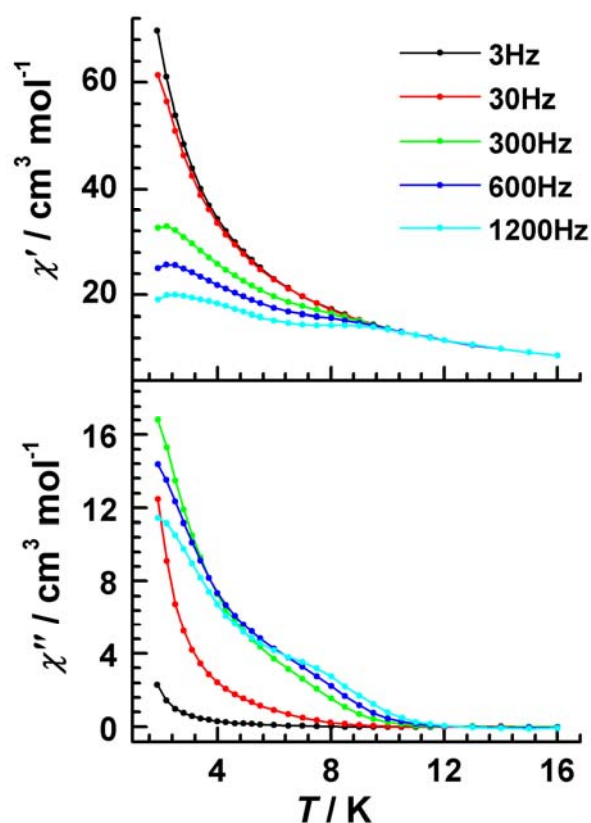

**Fig. S3** Temperature dependence of the in-phase (top) and out-of-phase (bottom) ac susceptibility of **1** under zero dc field.

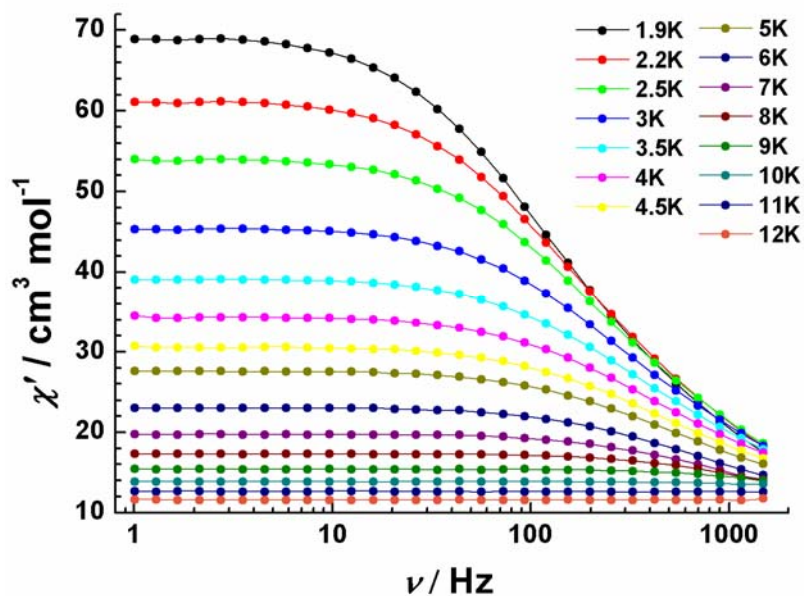

**Fig. S4** Frequency dependence of the in-phase ac susceptibility of **1** below 12 K, under zero-dc field.

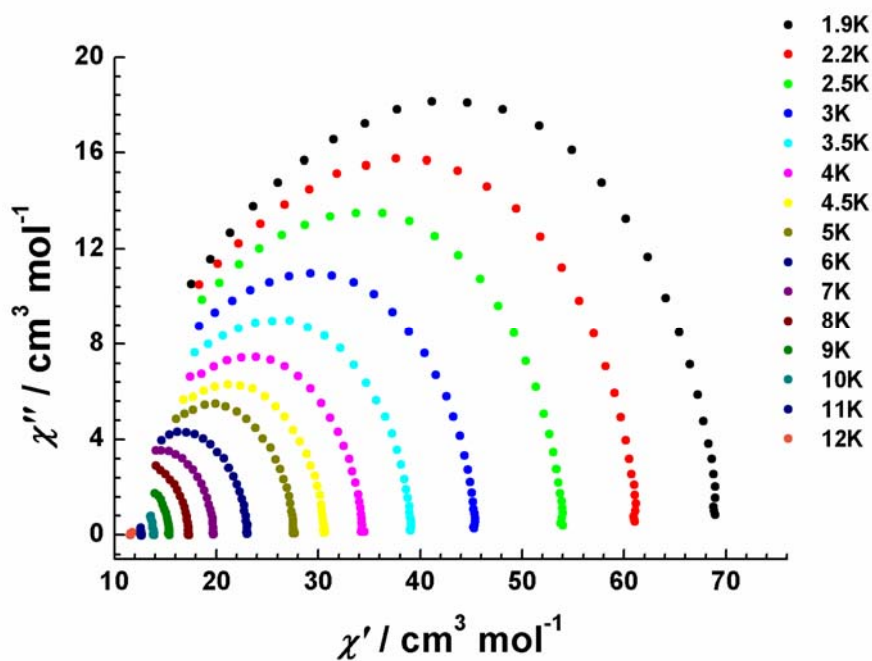

**Fig. S5** Cole-Cole plots measured below 12 K and zero-dc field.

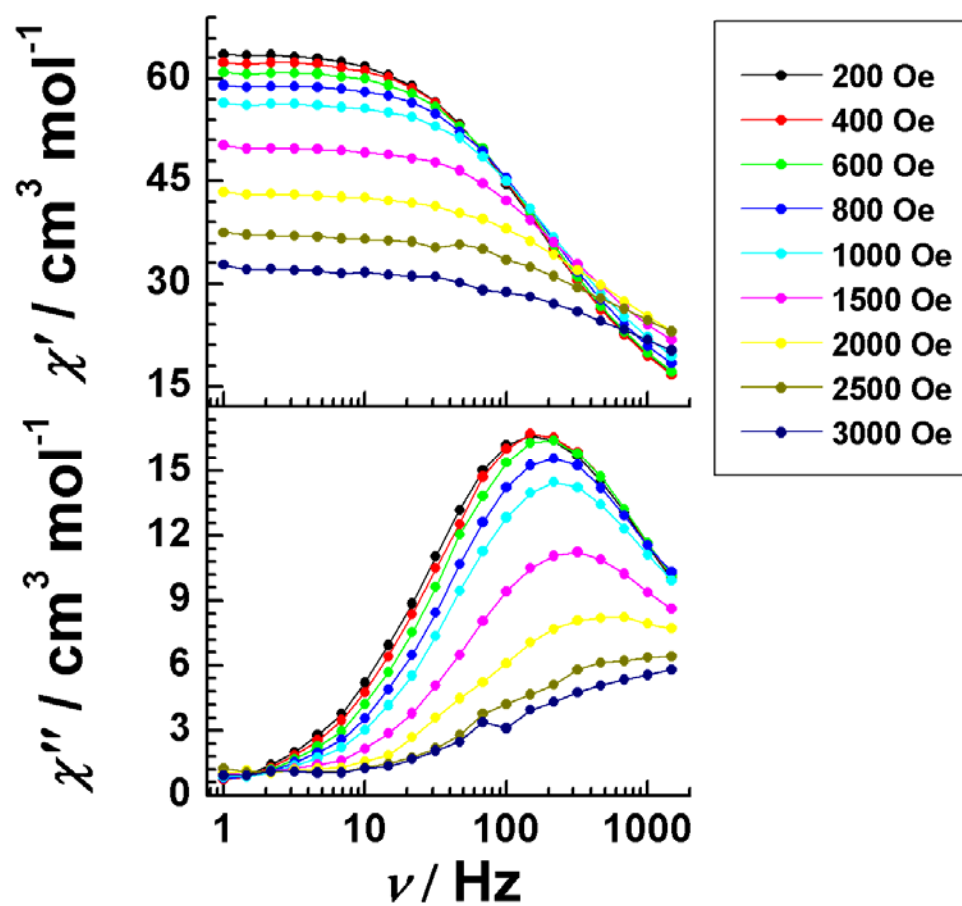

**Fig. S6** The in-phase (top) and the out-of-phase (bottom) ac susceptibility as a function of the dc applied field measured at 1.9 K for **1**.

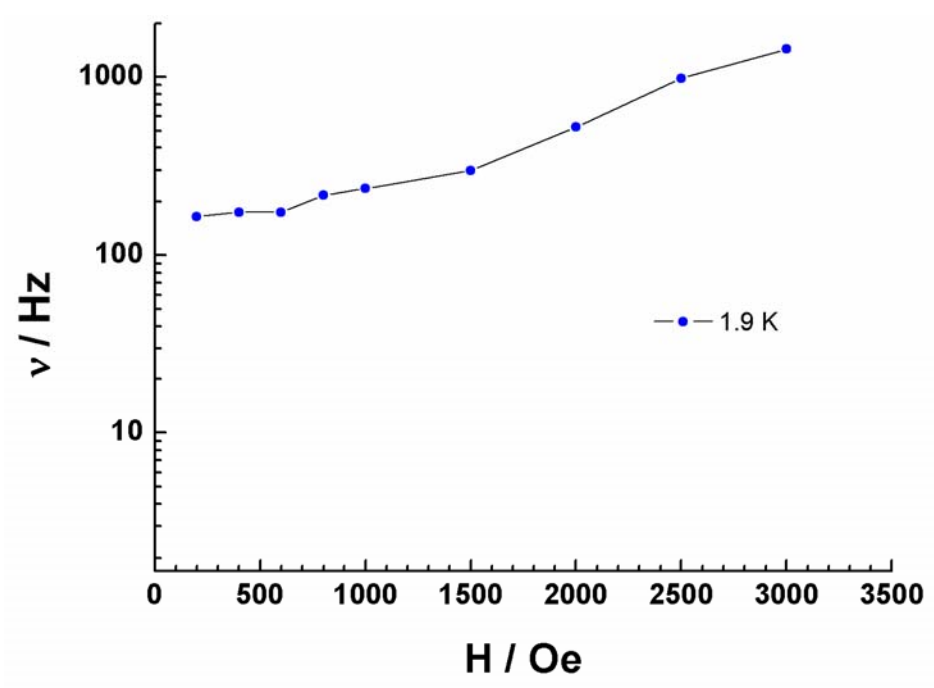

**Fig. S7** Field dependence of the characteristic frequency as a function of the applied dc field for **1** at 1.9 K.

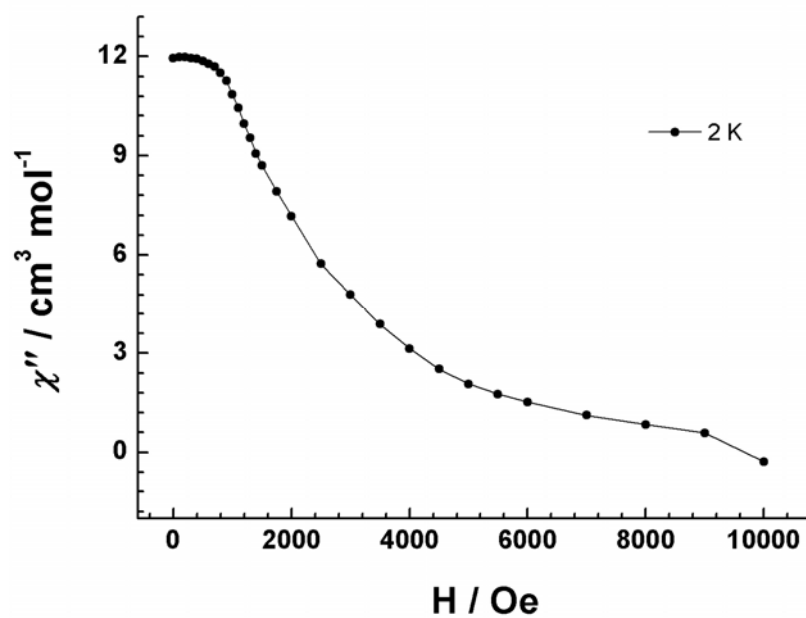

**Fig. S8** Field dependence of out-of-phase ac susceptibility of **1** at 1000 Hz and 2 K.
